# Supplementary material for: Quantitative Analysis of the Iris Surface Smoothness by Anterior Segment Optical Coherence Tomography in normal population
Source: Research Square preprint supplement (doi:10.21203/rs.3.rs-6628730/v1), 2025-06-23
Supplement: Supplementary file 1 [file 024d33472bde7edb8fe760fa.docx]

Supplementary Table1- The normal ranges of Act line1, Act line2, Basal line1, Basal line2, SI1, SI2 and Overall SI in sixteen axes based on sex, OD or OS and pupil status

| Sex | Eye | Pupil Status | | Axis | Act line1 | | Act line2 | | Basal line1 | | Basal line2 | | SI_1 | | SI_2 | | overall_SI | |
| --- | --- | --- | --- | --- | --- | --- | --- | --- | --- | --- | --- | --- | --- | --- | --- | --- | --- | --- |
| Mean  ±SD | Normal range | Mean  ±SD | Normal range | Mean  ±SD | Normal range | Mean  ±SD | Normal range | Mean  ±SD | Normal range | Mean  ±SD | Normal range | Mean  ±SD | Normal range |
| Lower to Upper | Lower to Upper | Lower to Upper | Lower to Upper | Lower to Upper | Lower to Upper | Lower to Upper |
| F | OD | Undilate | | 180T-0N | 510 ± 55 | 402 to 618 | 561 ± 69 | 426 to 696 | 426 ± 52 | 324 to 528 | 456 ± 59 | 340 to 572 | 0.834 ± 0.031 | 0.773 to 0.895 | 0.812 ± 0.037 | 0.739 to 0.885 | 0.822 ± 0.03 | 0.763 to 0.881 |
|  | | | | 191T-11N | 545 ± 60 | 427 to 663 | 579 ± 69 | 444 to 714 | 440 ± 51 | 340 to 540 | 456 ± 57 | 344 to 568 | 0.808 ± 0.031 | 0.747 to 0.869 | 0.788 ± 0.038 | 0.714 to 0.862 | 0.797 ± 0.03 | 0.738 to 0.856 |
| 203T-23N | 543 ± 59 | 427 to 659 | 565 ± 64 | 440 to 690 | 439 ± 51 | 339 to 539 | 451 ± 57 | 339 to 563 | 0.808 ± 0.036 | 0.737 to 0.879 | 0.798 ± 0.039 | 0.722 to 0.874 | 0.803 ± 0.034 | 0.736 to 0.87 |
| 214T-34N | 554 ± 55 | 446 to 662 | 565 ± 69 | 430 to 700 | 447 ± 50 | 349 to 545 | 455 ± 60 | 337 to 573 | 0.807 ± 0.037 | 0.734 to 0.88 | 0.804 ± 0.03 | 0.745 to 0.863 | 0.805 ± 0.029 | 0.748 to 0.862 |
| 225T-45N | 552 ± 61 | 432 to 672 | 558 ± 66 | 429 to 687 | 446 ± 54 | 340 to 552 | 452 ± 60 | 334 to 570 | 0.808 ± 0.033 | 0.743 to 0.873 | 0.809 ± 0.035 | 0.74 to 0.878 | 0.808 ± 0.029 | 0.751 to 0.865 |
| 236T-56N | 556 ± 48 | 462 to 650 | 562 ± 66 | 433 to 691 | 452 ± 50 | 354 to 550 | 453 ± 61 | 333 to 573 | 0.811 ± 0.034 | 0.744 to 0.878 | 0.806 ± 0.036 | 0.735 to 0.877 | 0.808 ± 0.03 | 0.749 to 0.867 |
| 248T-68N | 557 ± 58 | 443 to 671 | 554 ± 73 | 411 to 697 | 454 ± 52 | 352 to 556 | 449 ± 63 | 326 to 572 | 0.814 ± 0.034 | 0.747 to 0.881 | 0.811 ± 0.04 | 0.733 to 0.889 | 0.812 ± 0.033 | 0.747 to 0.877 |
| 259T-79N | 557 ± 65 | 430 to 684 | 550 ± 74 | 405 to 695 | 450 ± 55 | 342 to 558 | 447 ± 66 | 318 to 576 | 0.808 ± 0.043 | 0.724 to 0.892 | 0.812 ± 0.038 | 0.738 to 0.886 | 0.809 ± 0.036 | 0.738 to 0.88 |
| 270I-90S | 528 ± 60 | 410 to 646 | 545 ± 73 | 402 to 688 | 442 ± 59 | 326 to 558 | 446 ± 65 | 319 to 573 | 0.837 ± 0.034 | 0.77 to 0.904 | 0.82 ± 0.047 | 0.728 to 0.912 | 0.828 ± 0.035 | 0.759 to 0.897 |
| 281I-101S | 561 ± 70 | 424 to 698 | 552 ± 77 | 401 to 703 | 449 ± 56 | 339 to 559 | 443 ± 68 | 310 to 576 | 0.802 ± 0.051 | 0.702 to 0.902 | 0.802 ± 0.047 | 0.71 to 0.894 | 0.801 ± 0.043 | 0.717 to 0.885 |
| 293I-113S | 555 ± 65 | 428 to 682 | 538 ± 65 | 411 to 665 | 443 ± 59 | 327 to 559 | 437 ± 59 | 321 to 553 | 0.798 ± 0.035 | 0.729 to 0.867 | 0.812 ± 0.034 | 0.745 to 0.879 | 0.805 ± 0.028 | 0.75 to 0.86 |
| 304I-124S | 572 ± 71 | 433 to 711 | 533 ± 67 | 402 to 664 | 455 ± 59 | 339 to 571 | 432 ± 59 | 316 to 548 | 0.796 ± 0.034 | 0.729 to 0.863 | 0.81 ± 0.031 | 0.749 to 0.871 | 0.802 ± 0.027 | 0.749 to 0.855 |
| 315I-135S | 572 ± 68 | 439 to 705 | 532 ± 64 | 407 to 657 | 463 ± 61 | 343 to 583 | 431 ± 58 | 317 to 545 | 0.808 ± 0.032 | 0.745 to 0.871 | 0.809 ± 0.042 | 0.727 to 0.891 | 0.808 ± 0.03 | 0.749 to 0.867 |
| 326I-146S | 572 ± 70 | 435 to 709 | 526 ± 63 | 403 to 649 | 463 ± 61 | 343 to 583 | 425 ± 54 | 319 to 531 | 0.808 ± 0.035 | 0.739 to 0.877 | 0.808 ± 0.031 | 0.747 to 0.869 | 0.808 ± 0.027 | 0.755 to 0.861 |
| 338I-158S | 572 ± 71 | 433 to 711 | 522 ± 57 | 410 to 634 | 462 ± 59 | 346 to 578 | 425 ± 51 | 325 to 525 | 0.807 ± 0.031 | 0.746 to 0.868 | 0.814 ± 0.028 | 0.759 to 0.869 | 0.81 ± 0.025 | 0.761 to 0.859 |
| 349I-169S | 571 ± 71 | 432 to 710 | 523 ± 58 | 409 to 637 | 459 ± 60 | 341 to 577 | 425 ± 52 | 323 to 527 | 0.803 ± 0.03 | 0.744 to 0.862 | 0.812 ± 0.03 | 0.753 to 0.871 | 0.807 ± 0.025 | 0.758 to 0.856 |
| F | OD | Dilate | | 180T-0N | 423 ± 47 | 331 to 515 | 458 ± 47 | 366 to 550 | 340 ± 36 | 269 to 411 | 362 ± 38 | 288 to 436 | 0.805 ± 0.033 | 0.74 to 0.87 | 0.79 ± 0.039 | 0.714 to 0.866 | 0.797 ± 0.032 | 0.734 to 0.86 |
|  | | | | 191T-11N | 447 ± 42 | 365 to 529 | 470 ± 43 | 386 to 554 | 347 ± 38 | 273 to 421 | 357 ± 33 | 292 to 422 | 0.775 ± 0.033 | 0.71 to 0.84 | 0.762 ± 0.044 | 0.676 to 0.848 | 0.768 ± 0.032 | 0.705 to 0.831 |
| 203T-23N | 458 ± 37 | 385 to 531 | 462 ± 37 | 389 to 535 | 350 ± 33 | 285 to 415 | 355 ± 33 | 290 to 420 | 0.765 ± 0.033 | 0.7 to 0.83 | 0.769 ± 0.042 | 0.687 to 0.851 | 0.767 ± 0.033 | 0.702 to 0.832 |
| 214T-34N | 454 ± 42 | 372 to 536 | 458 ± 44 | 372 to 544 | 352 ± 36 | 281 to 423 | 354 ± 34 | 287 to 421 | 0.776 ± 0.032 | 0.713 to 0.839 | 0.774 ± 0.048 | 0.68 to 0.868 | 0.774 ± 0.035 | 0.705 to 0.843 |
| 225T-45N | 462 ± 43 | 378 to 546 | 451 ± 42 | 369 to 533 | 358 ± 39 | 282 to 434 | 354 ± 33 | 289 to 419 | 0.775 ± 0.04 | 0.697 to 0.853 | 0.786 ± 0.037 | 0.713 to 0.859 | 0.78 ± 0.033 | 0.715 to 0.845 |
| 236T-56N | 463 ± 41 | 383 to 543 | 452 ± 46 | 362 to 542 | 360 ± 37 | 287 to 433 | 355 ± 36 | 284 to 426 | 0.777 ± 0.033 | 0.712 to 0.842 | 0.787 ± 0.039 | 0.711 to 0.863 | 0.782 ± 0.03 | 0.723 to 0.841 |
| 248T-68N | 461 ± 45 | 373 to 549 | 449 ± 46 | 359 to 539 | 361 ± 39 | 285 to 437 | 358 ± 36 | 287 to 429 | 0.782 ± 0.04 | 0.704 to 0.86 | 0.798 ± 0.038 | 0.724 to 0.872 | 0.789 ± 0.034 | 0.722 to 0.856 |
| 259T-79N | 461 ± 40 | 383 to 539 | 459 ± 43 | 375 to 543 | 359 ± 36 | 288 to 430 | 358 ± 37 | 285 to 431 | 0.778 ± 0.037 | 0.705 to 0.851 | 0.78 ± 0.051 | 0.68 to 0.88 | 0.778 ± 0.039 | 0.702 to 0.854 |
| 270I-90S | 441 ± 45 | 353 to 529 | 456 ± 51 | 356 to 556 | 355 ± 39 | 279 to 431 | 361 ± 37 | 288 to 434 | 0.806 ± 0.039 | 0.73 to 0.882 | 0.795 ± 0.05 | 0.697 to 0.893 | 0.8 ± 0.035 | 0.731 to 0.869 |
| 281I-101S | 464 ± 50 | 366 to 562 | 463 ± 47 | 371 to 555 | 360 ± 42 | 278 to 442 | 359 ± 37 | 286 to 432 | 0.777 ± 0.047 | 0.685 to 0.869 | 0.775 ± 0.039 | 0.699 to 0.851 | 0.776 ± 0.034 | 0.709 to 0.843 |
| 293I-113S | 468 ± 45 | 380 to 556 | 449 ± 38 | 375 to 523 | 364 ± 39 | 288 to 440 | 354 ± 36 | 283 to 425 | 0.776 ± 0.034 | 0.709 to 0.843 | 0.788 ± 0.042 | 0.706 to 0.87 | 0.781 ± 0.033 | 0.716 to 0.846 |
| 304I-124S | 474 ± 46 | 384 to 564 | 449 ± 46 | 359 to 539 | 367 ± 40 | 289 to 445 | 350 ± 35 | 281 to 419 | 0.774 ± 0.04 | 0.696 to 0.852 | 0.779 ± 0.048 | 0.685 to 0.873 | 0.776 ± 0.037 | 0.703 to 0.849 |
| 315I-135S | 472 ± 47 | 380 to 564 | 438 ± 59 | 322 to 554 | 369 ± 39 | 293 to 445 | 342 ± 35 | 273 to 411 | 0.782 ± 0.038 | 0.708 to 0.856 | 0.786 ± 0.056 | 0.676 to 0.896 | 0.783 ± 0.04 | 0.705 to 0.861 |
| 326I-146S | 465 ± 47 | 373 to 557 | 427 ± 46 | 337 to 517 | 368 ± 41 | 288 to 448 | 338 ± 36 | 267 to 409 | 0.79 ± 0.03 | 0.731 to 0.849 | 0.793 ± 0.031 | 0.732 to 0.854 | 0.791 ± 0.026 | 0.74 to 0.842 |
| 338I-158S | 466 ± 53 | 362 to 570 | 425 ± 42 | 343 to 507 | 367 ± 39 | 291 to 443 | 336 ± 33 | 271 to 401 | 0.789 ± 0.043 | 0.705 to 0.873 | 0.791 ± 0.033 | 0.726 to 0.856 | 0.79 ± 0.032 | 0.727 to 0.853 |
| 349I-169S | 466 ± 48 | 372 to 560 | 428 ± 40 | 350 to 506 | 364 ± 39 | 288 to 440 | 337 ± 34 | 270 to 404 | 0.781 ± 0.035 | 0.712 to 0.85 | 0.788 ± 0.031 | 0.727 to 0.849 | 0.784 ± 0.026 | 0.733 to 0.835 |
| F | OS | Undilate | | 180N-0T | 563 ± 65 | 436 to 690 | 514 ± 61 | 394 to 634 | 461 ± 58 | 347 to 575 | 428 ± 60 | 310 to 546 | 0.819 ± 0.038 | 0.745 to 0.893 | 0.831 ± 0.034 | 0.764 to 0.898 | 0.824 ± 0.032 | 0.761 to 0.887 |
|  | | | | 191N-11T | 584 ± 67 | 453 to 715 | 512 ± 62 | 390 to 634 | 462 ± 57 | 350 to 574 | 419 ± 60 | 301 to 537 | 0.792 ± 0.036 | 0.721 to 0.863 | 0.817 ± 0.032 | 0.754 to 0.88 | 0.803 ± 0.031 | 0.742 to 0.864 |
| 203N-23T | 585 ± 70 | 448 to 722 | 513 ± 61 | 393 to 633 | 465 ± 58 | 351 to 579 | 418 ± 59 | 302 to 534 | 0.794 ± 0.035 | 0.725 to 0.863 | 0.813 ± 0.032 | 0.75 to 0.876 | 0.803 ± 0.03 | 0.744 to 0.862 |
| 214N-34T | 582 ± 70 | 445 to 719 | 510 ± 62 | 388 to 632 | 463 ± 59 | 347 to 579 | 417 ± 58 | 303 to 531 | 0.795 ± 0.039 | 0.719 to 0.871 | 0.817 ± 0.036 | 0.746 to 0.888 | 0.805 ± 0.031 | 0.744 to 0.866 |
| 225N-45T | 573 ± 61 | 453 to 693 | 518 ± 63 | 395 to 641 | 463 ± 60 | 345 to 581 | 421 ± 60 | 303 to 539 | 0.807 ± 0.039 | 0.731 to 0.883 | 0.812 ± 0.033 | 0.747 to 0.877 | 0.809 ± 0.033 | 0.744 to 0.874 |
| 236N-56T | 572 ± 66 | 443 to 701 | 530 ± 66 | 401 to 659 | 464 ± 62 | 342 to 586 | 428 ± 63 | 305 to 551 | 0.811 ± 0.036 | 0.74 to 0.882 | 0.806 ± 0.041 | 0.726 to 0.886 | 0.808 ± 0.033 | 0.743 to 0.873 |
| 248N-68T | 569 ± 70 | 432 to 706 | 536 ± 74 | 391 to 681 | 457 ± 63 | 334 to 580 | 436 ± 66 | 307 to 565 | 0.803 ± 0.05 | 0.705 to 0.901 | 0.812 ± 0.04 | 0.734 to 0.89 | 0.807 ± 0.04 | 0.729 to 0.885 |
| 259N-79T | 566 ± 94 | 382 to 750 | 539 ± 74 | 394 to 684 | 448 ± 64 | 323 to 573 | 439 ± 67 | 308 to 570 | 0.796 ± 0.067 | 0.665 to 0.927 | 0.815 ± 0.041 | 0.735 to 0.895 | 0.804 ± 0.05 | 0.706 to 0.902 |
| 270I-90S | 536 ± 60 | 418 to 654 | 536 ± 71 | 397 to 675 | 445 ± 63 | 322 to 568 | 448 ± 65 | 321 to 575 | 0.828 ± 0.036 | 0.757 to 0.899 | 0.835 ± 0.036 | 0.764 to 0.906 | 0.831 ± 0.033 | 0.766 to 0.896 |
| 281I-101S | 563 ± 77 | 412 to 714 | 551 ± 74 | 406 to 696 | 447 ± 62 | 325 to 569 | 444 ± 65 | 317 to 571 | 0.795 ± 0.056 | 0.685 to 0.905 | 0.806 ± 0.037 | 0.733 to 0.879 | 0.799 ± 0.041 | 0.719 to 0.879 |
| 293I-113S | 555 ± 66 | 426 to 684 | 549 ± 72 | 408 to 690 | 445 ± 57 | 333 to 557 | 447 ± 63 | 324 to 570 | 0.802 ± 0.051 | 0.702 to 0.902 | 0.813 ± 0.034 | 0.746 to 0.88 | 0.807 ± 0.037 | 0.734 to 0.88 |
| 304I-124S | 549 ± 62 | 427 to 671 | 547 ± 73 | 404 to 690 | 443 ± 58 | 329 to 557 | 446 ± 63 | 323 to 569 | 0.806 ± 0.052 | 0.704 to 0.908 | 0.814 ± 0.034 | 0.747 to 0.881 | 0.809 ± 0.036 | 0.738 to 0.88 |
|  | | | | 315I-135S | 551 ± 59 | 435 to 667 | 555 ± 70 | 418 to 692 | 444 ± 58 | 330 to 558 | 453 ± 62 | 331 to 575 | 0.805 ± 0.042 | 0.723 to 0.887 | 0.815 ± 0.026 | 0.764 to 0.866 | 0.809 ± 0.03 | 0.75 to 0.868 |
| 326I-146S | 543 ± 57 | 431 to 655 | 557 ± 67 | 426 to 688 | 438 ± 56 | 328 to 548 | 451 ± 59 | 335 to 567 | 0.806 ± 0.039 | 0.73 to 0.882 | 0.809 ± 0.038 | 0.735 to 0.883 | 0.807 ± 0.034 | 0.74 to 0.874 |
| 338I-158S | 544 ± 64 | 419 to 669 | 565 ± 69 | 430 to 700 | 442 ± 59 | 326 to 558 | 457 ± 59 | 341 to 573 | 0.812 ± 0.032 | 0.749 to 0.875 | 0.809 ± 0.029 | 0.752 to 0.866 | 0.81 ± 0.027 | 0.757 to 0.863 |
| 349I-169S | 539 ± 63 | 416 to 662 | 563 ± 67 | 432 to 694 | 437 ± 59 | 321 to 553 | 458 ± 58 | 344 to 572 | 0.809 ± 0.038 | 0.735 to 0.883 | 0.814 ± 0.034 | 0.747 to 0.881 | 0.811 ± 0.032 | 0.748 to 0.874 |
| F | OS | | Dilate | 180N-0T | 458 ± 47 | 366 to 550 | 426 ± 47 | 334 to 518 | 368 ± 40 | 290 to 446 | 343 ± 45 | 255 to 431 | 0.806 ± 0.044 | 0.72 to 0.892 | 0.803 ± 0.04 | 0.725 to 0.881 | 0.804 ± 0.038 | 0.73 to 0.878 |
|  | | | | 191N-11T | 481 ± 53 | 377 to 585 | 432 ± 44 | 346 to 518 | 370 ± 45 | 282 to 458 | 336 ± 44 | 250 to 422 | 0.769 ± 0.049 | 0.673 to 0.865 | 0.776 ± 0.039 | 0.7 to 0.852 | 0.772 ± 0.04 | 0.694 to 0.85 |
| 203N-23T | 475 ± 52 | 373 to 577 | 427 ± 39 | 351 to 503 | 369 ± 42 | 287 to 451 | 335 ± 40 | 257 to 413 | 0.777 ± 0.034 | 0.71 to 0.844 | 0.784 ± 0.04 | 0.706 to 0.862 | 0.78 ± 0.033 | 0.715 to 0.845 |
| 214N-34T | 472 ± 48 | 378 to 566 | 429 ± 45 | 341 to 517 | 371 ± 42 | 289 to 453 | 337 ± 42 | 255 to 419 | 0.785 ± 0.038 | 0.711 to 0.859 | 0.786 ± 0.036 | 0.715 to 0.857 | 0.785 ± 0.033 | 0.72 to 0.85 |
| 225N-45T | 474 ± 49 | 378 to 570 | 430 ± 48 | 336 to 524 | 373 ± 46 | 283 to 463 | 339 ± 45 | 251 to 427 | 0.787 ± 0.037 | 0.714 to 0.86 | 0.787 ± 0.038 | 0.713 to 0.861 | 0.787 ± 0.033 | 0.722 to 0.852 |
| 236N-56T | 469 ± 52 | 367 to 571 | 434 ± 51 | 334 to 534 | 369 ± 47 | 277 to 461 | 341 ± 42 | 259 to 423 | 0.787 ± 0.044 | 0.701 to 0.873 | 0.787 ± 0.049 | 0.691 to 0.883 | 0.787 ± 0.042 | 0.705 to 0.869 |
| 248N-68T | 461 ± 54 | 355 to 567 | 446 ± 44 | 360 to 532 | 365 ± 47 | 273 to 457 | 351 ± 41 | 271 to 431 | 0.792 ± 0.039 | 0.716 to 0.868 | 0.787 ± 0.048 | 0.693 to 0.881 | 0.789 ± 0.038 | 0.715 to 0.863 |
| 259N-79T | 464 ± 55 | 356 to 572 | 452 ± 40 | 374 to 530 | 363 ± 45 | 275 to 451 | 359 ± 35 | 290 to 428 | 0.783 ± 0.045 | 0.695 to 0.871 | 0.794 ± 0.049 | 0.698 to 0.89 | 0.788 ± 0.041 | 0.708 to 0.868 |
| 270I-90S | 447 ± 45 | 359 to 535 | 448 ± 57 | 336 to 560 | 360 ± 46 | 270 to 450 | 362 ± 40 | 284 to 440 | 0.804 ± 0.049 | 0.708 to 0.9 | 0.811 ± 0.055 | 0.703 to 0.919 | 0.807 ± 0.044 | 0.721 to 0.893 |
| 281I-101S | 460 ± 55 | 352 to 568 | 448 ± 44 | 362 to 534 | 356 ± 45 | 268 to 444 | 354 ± 41 | 274 to 434 | 0.776 ± 0.047 | 0.684 to 0.868 | 0.788 ± 0.034 | 0.721 to 0.855 | 0.781 ± 0.035 | 0.712 to 0.85 |
| 293I-113S | 460 ± 46 | 370 to 550 | 444 ± 46 | 354 to 534 | 358 ± 44 | 272 to 444 | 356 ± 43 | 272 to 440 | 0.778 ± 0.042 | 0.696 to 0.86 | 0.801 ± 0.032 | 0.738 to 0.864 | 0.789 ± 0.033 | 0.724 to 0.854 |
| 304I-124S | 457 ± 47 | 365 to 549 | 442 ± 49 | 346 to 538 | 358 ± 44 | 272 to 444 | 353 ± 44 | 267 to 439 | 0.783 ± 0.043 | 0.699 to 0.867 | 0.797 ± 0.035 | 0.728 to 0.866 | 0.79 ± 0.032 | 0.727 to 0.853 |
| 315I-135S | 460 ± 51 | 360 to 560 | 449 ± 53 | 345 to 553 | 359 ± 43 | 275 to 443 | 356 ± 44 | 270 to 442 | 0.782 ± 0.044 | 0.696 to 0.868 | 0.793 ± 0.036 | 0.722 to 0.864 | 0.787 ± 0.034 | 0.72 to 0.854 |
| 326I-146S | 455 ± 49 | 359 to 551 | 447 ± 49 | 351 to 543 | 357 ± 45 | 269 to 445 | 355 ± 42 | 273 to 437 | 0.783 ± 0.045 | 0.695 to 0.871 | 0.795 ± 0.039 | 0.719 to 0.871 | 0.788 ± 0.034 | 0.721 to 0.855 |
| 338I-158S | 448 ± 51 | 348 to 548 | 452 ± 46 | 362 to 542 | 353 ± 47 | 261 to 445 | 360 ± 40 | 282 to 438 | 0.786 ± 0.036 | 0.715 to 0.857 | 0.796 ± 0.037 | 0.723 to 0.869 | 0.791 ± 0.032 | 0.728 to 0.854 |
| 349I-169S | 444 ± 53 | 340 to 548 | 461 ± 46 | 371 to 551 | 351 ± 48 | 257 to 445 | 362 ± 40 | 284 to 440 | 0.79 ± 0.035 | 0.721 to 0.859 | 0.786 ± 0.042 | 0.704 to 0.868 | 0.788 ± 0.033 | 0.723 to 0.853 |

| Sex | Eye | | Pupil Status | | Axis | Act_line_1 | | Act_line_2 | | basal_line_1 | | basal_line_2 | | SI_1 | | SI_2 | | overall_SI | |
| --- | --- | --- | --- | --- | --- | --- | --- | --- | --- | --- | --- | --- | --- | --- | --- | --- | --- | --- | --- |
| Mean  ±SD | Normal range | Mean  ±SD | Normal range | Mean  ±SD | Normal range | Mean  ±SD | Normal range | Mean  ±SD | Normal range | Mean  ±SD | Normal range | Mean  ±SD | Normal range |
| Lower to Upper | Lower to Upper | Lower to Upper | Lower to Upper | Lower to Upper | Lower to Upper | Lower to Upper |
| M | OD | | Undilate | | 180T-0N | 533 ± 69 | 398 to 668 | 581 ± 85 | 414 to 748 | 447 ± 67 | 316 to 578 | 475 ± 75 | 328 to 622 | 0.838 ± 0.048 | 0.744 to 0.932 | 0.816 ± 0.044 | 0.73 to 0.902 | 0.826 ± 0.04 | 0.748 to 0.904 |
|  | | | | | 191T-11N | 549 ± 69 | 414 to 684 | 596 ± 82 | 435 to 757 | 451 ± 69 | 316 to 586 | 476 ± 72 | 335 to 617 | 0.819 ± 0.048 | 0.725 to 0.913 | 0.798 ± 0.048 | 0.704 to 0.892 | 0.807 ± 0.043 | 0.723 to 0.891 |
| 203T-23N | 558 ± 66 | 429 to 687 | 591 ± 79 | 436 to 746 | 457 ± 69 | 322 to 592 | 474 ± 71 | 335 to 613 | 0.817 ± 0.045 | 0.729 to 0.905 | 0.802 ± 0.044 | 0.716 to 0.888 | 0.809 ± 0.038 | 0.735 to 0.883 |
| 214T-34N | 563 ± 67 | 432 to 694 | 582 ± 76 | 433 to 731 | 461 ± 69 | 326 to 596 | 476 ± 72 | 335 to 617 | 0.817 ± 0.041 | 0.737 to 0.897 | 0.816 ± 0.036 | 0.745 to 0.887 | 0.816 ± 0.034 | 0.749 to 0.883 |
| 225T-45N | 572 ± 73 | 429 to 715 | 583 ± 75 | 436 to 730 | 466 ± 71 | 327 to 605 | 475 ± 73 | 332 to 618 | 0.814 ± 0.046 | 0.724 to 0.904 | 0.814 ± 0.039 | 0.738 to 0.89 | 0.814 ± 0.038 | 0.74 to 0.888 |
| 236T-56N | 572 ± 70 | 435 to 709 | 586 ± 83 | 423 to 749 | 470 ± 70 | 333 to 607 | 477 ± 73 | 334 to 620 | 0.82 ± 0.039 | 0.744 to 0.896 | 0.814 ± 0.042 | 0.732 to 0.896 | 0.817 ± 0.037 | 0.744 to 0.89 |
| 248T-68N | 574 ± 70 | 437 to 711 | 577 ± 79 | 422 to 732 | 471 ± 72 | 330 to 612 | 474 ± 72 | 333 to 615 | 0.818 ± 0.046 | 0.728 to 0.908 | 0.821 ± 0.041 | 0.741 to 0.901 | 0.819 ± 0.038 | 0.745 to 0.893 |
| 259T-79N | 563 ± 76 | 414 to 712 | 576 ± 79 | 421 to 731 | 467 ± 76 | 318 to 616 | 474 ± 74 | 329 to 619 | 0.828 ± 0.039 | 0.752 to 0.904 | 0.822 ± 0.041 | 0.742 to 0.902 | 0.825 ± 0.036 | 0.754 to 0.896 |
| 270I-90S | 546 ± 88 | 374 to 718 | 559 ± 75 | 412 to 706 | 460 ± 87 | 289 to 631 | 471 ± 74 | 326 to 616 | 0.84 ± 0.058 | 0.726 to 0.954 | 0.841 ± 0.037 | 0.768 to 0.914 | 0.839 ± 0.036 | 0.768 to 0.91 |
| 281I-101S | 577 ± 85 | 410 to 744 | 581 ± 83 | 418 to 744 | 465 ± 79 | 310 to 620 | 471 ± 75 | 324 to 618 | 0.804 ± 0.058 | 0.69 to 0.918 | 0.809 ± 0.041 | 0.729 to 0.889 | 0.806 ± 0.043 | 0.722 to 0.89 |
| 293I-113S | 592 ± 78 | 439 to 745 | 571 ± 79 | 416 to 726 | 473 ± 80 | 316 to 630 | 465 ± 73 | 322 to 608 | 0.797 ± 0.062 | 0.675 to 0.919 | 0.814 ± 0.041 | 0.734 to 0.894 | 0.804 ± 0.046 | 0.714 to 0.894 |
| 304I-124S | 584 ± 86 | 415 to 753 | 549 ± 72 | 408 to 690 | 471 ± 79 | 316 to 626 | 454 ± 71 | 315 to 593 | 0.805 ± 0.047 | 0.713 to 0.897 | 0.825 ± 0.039 | 0.749 to 0.901 | 0.814 ± 0.037 | 0.741 to 0.887 |
| 315I-135S | 589 ± 90 | 413 to 765 | 541 ± 69 | 406 to 676 | 478 ± 79 | 323 to 633 | 448 ± 68 | 315 to 581 | 0.811 ± 0.04 | 0.733 to 0.889 | 0.827 ± 0.042 | 0.745 to 0.909 | 0.818 ± 0.036 | 0.747 to 0.889 |
| 326I-146S | 590 ± 86 | 421 to 759 | 533 ± 74 | 388 to 678 | 478 ± 77 | 327 to 629 | 440 ± 69 | 305 to 575 | 0.81 ± 0.05 | 0.712 to 0.908 | 0.823 ± 0.037 | 0.75 to 0.896 | 0.815 ± 0.038 | 0.741 to 0.889 |
| 338I-158S | 590 ± 78 | 437 to 743 | 536 ± 71 | 397 to 675 | 478 ± 73 | 335 to 621 | 438 ± 64 | 313 to 563 | 0.81 ± 0.044 | 0.724 to 0.896 | 0.819 ± 0.054 | 0.713 to 0.925 | 0.813 ± 0.04 | 0.735 to 0.891 |
| 349I-169S | 599 ± 88 | 427 to 771 | 530 ± 63 | 407 to 653 | 478 ± 74 | 333 to 623 | 438 ± 60 | 320 to 556 | 0.798 ± 0.041 | 0.718 to 0.878 | 0.825 ± 0.041 | 0.745 to 0.905 | 0.81 ± 0.036 | 0.739 to 0.881 |
| M | OD | | Dilate | | 180T-0N | 424 ± 62 | 302 to 546 | 458 ± 63 | 335 to 581 | 346 ± 54 | 240 to 452 | 365 ± 50 | 267 to 463 | 0.815 ± 0.033 | 0.75 to 0.88 | 0.798 ± 0.038 | 0.724 to 0.872 | 0.806 ± 0.03 | 0.747 to 0.865 |
|  | | | | | 191T-11N | 453 ± 64 | 328 to 578 | 465 ± 64 | 340 to 590 | 355 ± 56 | 245 to 465 | 364 ± 48 | 270 to 458 | 0.783 ± 0.035 | 0.714 to 0.852 | 0.784 ± 0.031 | 0.723 to 0.845 | 0.784 ± 0.028 | 0.729 to 0.839 |
| 203T-23N | 465 ± 62 | 343 to 587 | 462 ± 61 | 342 to 582 | 361 ± 55 | 253 to 469 | 360 ± 49 | 264 to 456 | 0.775 ± 0.042 | 0.693 to 0.857 | 0.781 ± 0.041 | 0.701 to 0.861 | 0.778 ± 0.035 | 0.709 to 0.847 |
| 214T-34N | 467 ± 65 | 340 to 594 | 454 ± 56 | 344 to 564 | 362 ± 54 | 256 to 468 | 358 ± 44 | 272 to 444 | 0.776 ± 0.034 | 0.709 to 0.843 | 0.791 ± 0.032 | 0.728 to 0.854 | 0.783 ± 0.029 | 0.726 to 0.84 |
| 225T-45N | 467 ± 58 | 353 to 581 | 452 ± 54 | 346 to 558 | 367 ± 53 | 263 to 471 | 362 ± 46 | 272 to 452 | 0.785 ± 0.036 | 0.714 to 0.856 | 0.801 ± 0.035 | 0.732 to 0.87 | 0.793 ± 0.03 | 0.734 to 0.852 |
| 236T-56N | 478 ± 58 | 364 to 592 | 461 ± 62 | 339 to 583 | 368 ± 53 | 264 to 472 | 365 ± 48 | 271 to 459 | 0.771 ± 0.053 | 0.667 to 0.875 | 0.793 ± 0.034 | 0.726 to 0.86 | 0.781 ± 0.038 | 0.707 to 0.855 |
| 248T-68N | 476 ± 61 | 356 to 596 | 458 ± 57 | 346 to 570 | 368 ± 51 | 268 to 468 | 365 ± 46 | 275 to 455 | 0.775 ± 0.065 | 0.648 to 0.902 | 0.798 ± 0.039 | 0.722 to 0.874 | 0.786 ± 0.05 | 0.688 to 0.884 |
| 259T-79N | 468 ± 51 | 368 to 568 | 457 ± 57 | 345 to 569 | 365 ± 49 | 269 to 461 | 365 ± 45 | 277 to 453 | 0.78 ± 0.046 | 0.69 to 0.87 | 0.801 ± 0.033 | 0.736 to 0.866 | 0.79 ± 0.035 | 0.721 to 0.859 |
| 270I-90S | 456 ± 61 | 336 to 576 | 453 ± 51 | 353 to 553 | 367 ± 50 | 269 to 465 | 369 ± 45 | 281 to 457 | 0.804 ± 0.049 | 0.708 to 0.9 | 0.815 ± 0.031 | 0.754 to 0.876 | 0.809 ± 0.033 | 0.744 to 0.874 |
| 281I-101S | 475 ± 68 | 342 to 608 | 468 ± 63 | 345 to 591 | 369 ± 55 | 261 to 477 | 368 ± 49 | 272 to 464 | 0.777 ± 0.041 | 0.697 to 0.857 | 0.788 ± 0.039 | 0.712 to 0.864 | 0.782 ± 0.034 | 0.715 to 0.849 |
| 293I-113S | 483 ± 64 | 358 to 608 | 456 ± 58 | 342 to 570 | 374 ± 51 | 274 to 474 | 360 ± 49 | 264 to 456 | 0.777 ± 0.048 | 0.683 to 0.871 | 0.789 ± 0.038 | 0.715 to 0.863 | 0.782 ± 0.031 | 0.721 to 0.843 |
| 304I-124S | 484 ± 64 | 359 to 609 | 449 ± 61 | 329 to 569 | 377 ± 49 | 281 to 473 | 355 ± 52 | 253 to 457 | 0.781 ± 0.045 | 0.693 to 0.869 | 0.791 ± 0.037 | 0.718 to 0.864 | 0.786 ± 0.033 | 0.721 to 0.851 |
| 315I-135S | 478 ± 68 | 345 to 611 | 437 ± 58 | 323 to 551 | 375 ± 49 | 279 to 471 | 350 ± 51 | 250 to 450 | 0.786 ± 0.048 | 0.692 to 0.88 | 0.801 ± 0.035 | 0.732 to 0.87 | 0.793 ± 0.033 | 0.728 to 0.858 |
| 326I-146S | 475 ± 73 | 332 to 618 | 430 ± 63 | 307 to 553 | 376 ± 51 | 276 to 476 | 344 ± 53 | 240 to 448 | 0.795 ± 0.043 | 0.711 to 0.879 | 0.8 ± 0.038 | 0.726 to 0.874 | 0.796 ± 0.032 | 0.733 to 0.859 |
| 338I-158S | 465 ± 67 | 334 to 596 | 430 ± 65 | 303 to 557 | 373 ± 51 | 273 to 473 | 342 ± 55 | 234 to 450 | 0.804 ± 0.038 | 0.73 to 0.878 | 0.796 ± 0.032 | 0.733 to 0.859 | 0.8 ± 0.031 | 0.739 to 0.861 |
| 349I-169S | 472 ± 69 | 337 to 607 | 430 ± 65 | 303 to 557 | 369 ± 51 | 269 to 469 | 341 ± 54 | 235 to 447 | 0.784 ± 0.044 | 0.698 to 0.87 | 0.794 ± 0.035 | 0.725 to 0.863 | 0.788 ± 0.032 | 0.725 to 0.851 |
| M | OS | | Undilate | | 180N-0T | 565 ± 85 | 398 to 732 | 517 ± 63 | 394 to 640 | 468 ± 78 | 315 to 621 | 435 ± 62 | 313 to 557 | 0.828 ± 0.044 | 0.742 to 0.914 | 0.839 ± 0.04 | 0.761 to 0.917 | 0.833 ± 0.037 | 0.76 to 0.906 |
|  | | | | | 191N-11T | 584 ± 92 | 404 to 764 | 522 ± 66 | 393 to 651 | 469 ± 77 | 318 to 620 | 427 ± 60 | 309 to 545 | 0.803 ± 0.04 | 0.725 to 0.881 | 0.817 ± 0.047 | 0.725 to 0.909 | 0.809 ± 0.039 | 0.733 to 0.885 |
| 203N-23T | 584 ± 86 | 415 to 753 | 517 ± 68 | 384 to 650 | 469 ± 77 | 318 to 620 | 426 ± 65 | 299 to 553 | 0.803 ± 0.039 | 0.727 to 0.879 | 0.823 ± 0.038 | 0.749 to 0.897 | 0.812 ± 0.033 | 0.747 to 0.877 |
| 214N-34T | 590 ± 89 | 416 to 764 | 524 ± 70 | 387 to 661 | 472 ± 76 | 323 to 621 | 432 ± 67 | 301 to 563 | 0.8 ± 0.037 | 0.727 to 0.873 | 0.822 ± 0.04 | 0.744 to 0.9 | 0.81 ± 0.033 | 0.745 to 0.875 |
| 225N-45T | 581 ± 79 | 426 to 736 | 534 ± 66 | 405 to 663 | 471 ± 76 | 322 to 620 | 441 ± 65 | 314 to 568 | 0.809 ± 0.036 | 0.738 to 0.88 | 0.824 ± 0.037 | 0.751 to 0.897 | 0.816 ± 0.034 | 0.749 to 0.883 |
| 236N-56T | 580 ± 88 | 408 to 752 | 545 ± 77 | 394 to 696 | 470 ± 77 | 319 to 621 | 447 ± 67 | 316 to 578 | 0.81 ± 0.041 | 0.73 to 0.89 | 0.821 ± 0.05 | 0.723 to 0.919 | 0.815 ± 0.04 | 0.737 to 0.893 |
| 248N-68T | 569 ± 82 | 408 to 730 | 548 ± 77 | 397 to 699 | 464 ± 76 | 315 to 613 | 453 ± 71 | 314 to 592 | 0.814 ± 0.035 | 0.745 to 0.883 | 0.825 ± 0.035 | 0.756 to 0.894 | 0.819 ± 0.03 | 0.76 to 0.878 |
| 259N-79T | 555 ± 84 | 390 to 720 | 563 ± 76 | 414 to 712 | 453 ± 73 | 310 to 596 | 462 ± 70 | 325 to 599 | 0.815 ± 0.031 | 0.754 to 0.876 | 0.82 ± 0.041 | 0.74 to 0.9 | 0.817 ± 0.03 | 0.758 to 0.876 |
| 270I-90S | 540 ± 85 | 373 to 707 | 561 ± 80 | 404 to 718 | 447 ± 79 | 292 to 602 | 465 ± 72 | 324 to 606 | 0.827 ± 0.052 | 0.725 to 0.929 | 0.829 ± 0.048 | 0.735 to 0.923 | 0.827 ± 0.041 | 0.747 to 0.907 |
| 281I-101S | 565 ± 83 | 402 to 728 | 563 ± 80 | 406 to 720 | 450 ± 73 | 307 to 593 | 464 ± 74 | 319 to 609 | 0.795 ± 0.049 | 0.699 to 0.891 | 0.822 ± 0.033 | 0.757 to 0.887 | 0.808 ± 0.035 | 0.739 to 0.877 |
| 293I-113S | 561 ± 77 | 410 to 712 | 565 ± 84 | 400 to 730 | 452 ± 69 | 317 to 587 | 459 ± 74 | 314 to 604 | 0.804 ± 0.041 | 0.724 to 0.884 | 0.812 ± 0.042 | 0.73 to 0.894 | 0.808 ± 0.037 | 0.735 to 0.881 |
| 304I-124S | 571 ± 93 | 389 to 753 | 563 ± 88 | 391 to 735 | 454 ± 69 | 319 to 589 | 460 ± 75 | 313 to 607 | 0.799 ± 0.056 | 0.689 to 0.909 | 0.817 ± 0.043 | 0.733 to 0.901 | 0.806 ± 0.042 | 0.724 to 0.888 |
| 315I-135S | 554 ± 71 | 415 to 693 | 569 ± 89 | 395 to 743 | 455 ± 66 | 326 to 584 | 462 ± 73 | 319 to 605 | 0.82 ± 0.036 | 0.749 to 0.891 | 0.812 ± 0.05 | 0.714 to 0.91 | 0.815 ± 0.037 | 0.742 to 0.888 |
| 326I-146S | 556 ± 67 | 425 to 687 | 561 ± 81 | 402 to 720 | 456 ± 62 | 334 to 578 | 459 ± 76 | 310 to 608 | 0.819 ± 0.042 | 0.737 to 0.901 | 0.818 ± 0.041 | 0.738 to 0.898 | 0.818 ± 0.039 | 0.742 to 0.894 |
| 338I-158S | 553 ± 71 | 414 to 692 | 572 ± 93 | 390 to 754 | 451 ± 66 | 322 to 580 | 463 ± 77 | 312 to 614 | 0.816 ± 0.042 | 0.734 to 0.898 | 0.812 ± 0.049 | 0.716 to 0.908 | 0.813 ± 0.04 | 0.735 to 0.891 |
| 349I-169S | 551 ± 73 | 408 to 694 | 572 ± 84 | 407 to 737 | 450 ± 65 | 323 to 577 | 465 ± 74 | 320 to 610 | 0.817 ± 0.048 | 0.723 to 0.911 | 0.812 ± 0.04 | 0.734 to 0.89 | 0.814 ± 0.039 | 0.738 to 0.89 |
| M | | OS | | Dilate | 180N-0T | 451 ± 73 | 308 to 594 | 419 ± 60 | 301 to 537 | 364 ± 55 | 256 to 472 | 339 ± 53 | 235 to 443 | 0.81 ± 0.04 | 0.732 to 0.888 | 0.809 ± 0.031 | 0.748 to 0.87 | 0.809 ± 0.03 | 0.75 to 0.868 |
|  | | | | | 191N-11T | 472 ± 74 | 327 to 617 | 421 ± 65 | 294 to 548 | 368 ± 54 | 262 to 474 | 332 ± 55 | 224 to 440 | 0.781 ± 0.039 | 0.705 to 0.857 | 0.787 ± 0.038 | 0.713 to 0.861 | 0.784 ± 0.031 | 0.723 to 0.845 |
| 203N-23T | 470 ± 68 | 337 to 603 | 424 ± 67 | 293 to 555 | 366 ± 53 | 262 to 470 | 334 ± 55 | 226 to 442 | 0.78 ± 0.041 | 0.7 to 0.86 | 0.788 ± 0.036 | 0.717 to 0.859 | 0.783 ± 0.032 | 0.72 to 0.846 |
| 214N-34T | 466 ± 69 | 331 to 601 | 427 ± 57 | 315 to 539 | 365 ± 54 | 259 to 471 | 339 ± 50 | 241 to 437 | 0.784 ± 0.035 | 0.715 to 0.853 | 0.792 ± 0.032 | 0.729 to 0.855 | 0.787 ± 0.029 | 0.73 to 0.844 |
| 225N-45T | 472 ± 65 | 345 to 599 | 435 ± 60 | 317 to 553 | 366 ± 55 | 258 to 474 | 346 ± 49 | 250 to 442 | 0.776 ± 0.05 | 0.678 to 0.874 | 0.795 ± 0.036 | 0.724 to 0.866 | 0.785 ± 0.039 | 0.709 to 0.861 |
| 236N-56T | 473 ± 67 | 342 to 604 | 445 ± 63 | 322 to 568 | 373 ± 55 | 265 to 481 | 353 ± 51 | 253 to 453 | 0.788 ± 0.043 | 0.704 to 0.872 | 0.795 ± 0.034 | 0.728 to 0.862 | 0.791 ± 0.035 | 0.722 to 0.86 |
| 248N-68T | 467 ± 65 | 340 to 594 | 451 ± 62 | 329 to 573 | 366 ± 53 | 262 to 470 | 359 ± 50 | 261 to 457 | 0.783 ± 0.052 | 0.681 to 0.885 | 0.796 ± 0.037 | 0.723 to 0.869 | 0.789 ± 0.041 | 0.709 to 0.869 |
| 259N-79T | 470 ± 68 | 337 to 603 | 456 ± 66 | 327 to 585 | 361 ± 55 | 253 to 469 | 362 ± 50 | 264 to 460 | 0.771 ± 0.063 | 0.648 to 0.894 | 0.795 ± 0.041 | 0.715 to 0.875 | 0.782 ± 0.047 | 0.69 to 0.874 |
| 270I-90S | 450 ± 78 | 297 to 603 | 444 ± 64 | 319 to 569 | 358 ± 53 | 254 to 462 | 364 ± 52 | 262 to 466 | 0.802 ± 0.068 | 0.669 to 0.935 | 0.82 ± 0.027 | 0.767 to 0.873 | 0.809 ± 0.048 | 0.715 to 0.903 |
| 281I-101S | 461 ± 58 | 347 to 575 | 454 ± 68 | 321 to 587 | 359 ± 48 | 265 to 453 | 361 ± 53 | 257 to 465 | 0.781 ± 0.043 | 0.697 to 0.865 | 0.796 ± 0.037 | 0.723 to 0.869 | 0.788 ± 0.033 | 0.723 to 0.853 |
| 293I-113S | 465 ± 79 | 310 to 620 | 454 ± 71 | 315 to 593 | 359 ± 50 | 261 to 457 | 358 ± 54 | 252 to 464 | 0.78 ± 0.068 | 0.647 to 0.913 | 0.792 ± 0.046 | 0.702 to 0.882 | 0.784 ± 0.052 | 0.682 to 0.886 |
| 304I-124S | 456 ± 61 | 336 to 576 | 451 ± 72 | 310 to 592 | 360 ± 49 | 264 to 456 | 360 ± 54 | 254 to 466 | 0.79 ± 0.035 | 0.721 to 0.859 | 0.801 ± 0.039 | 0.725 to 0.877 | 0.795 ± 0.03 | 0.736 to 0.854 |
| 315I-135S | 456 ± 60 | 338 to 574 | 449 ± 67 | 318 to 580 | 359 ± 52 | 257 to 461 | 360 ± 53 | 256 to 464 | 0.785 ± 0.036 | 0.714 to 0.856 | 0.802 ± 0.038 | 0.728 to 0.876 | 0.794 ± 0.034 | 0.727 to 0.861 |
| 326I-146S | 451 ± 61 | 331 to 571 | 454 ± 71 | 315 to 593 | 358 ± 51 | 258 to 458 | 361 ± 53 | 257 to 465 | 0.794 ± 0.038 | 0.72 to 0.868 | 0.797 ± 0.041 | 0.717 to 0.877 | 0.795 ± 0.034 | 0.728 to 0.862 |
| 338I-158S | 447 ± 64 | 322 to 572 | 450 ± 69 | 315 to 585 | 354 ± 52 | 252 to 456 | 359 ± 54 | 253 to 465 | 0.793 ± 0.037 | 0.72 to 0.866 | 0.798 ± 0.037 | 0.725 to 0.871 | 0.795 ± 0.03 | 0.736 to 0.854 |
| 349I-169S | 440 ± 59 | 324 to 556 | 454 ± 72 | 313 to 595 | 351 ± 51 | 251 to 451 | 360 ± 53 | 256 to 464 | 0.797 ± 0.032 | 0.734 to 0.86 | 0.796 ± 0.041 | 0.716 to 0.876 | 0.796 ± 0.029 | 0.739 to 0.853 |

Supplementary Table2- Comparison of all the sixteen axes overall SI, organized by eye (OD or OS) based on the pupil status.

| Axis | Parameter | B | Std. Error | 95% Wald Confidence Interval | | Hypothesis Test | | |
| --- | --- | --- | --- | --- | --- | --- | --- | --- |
| Lower | Upper | Wald Chi-Square | df | P value |
| 180 | Pupil | 0.804 | 0.0030 | 0.798 | 0.810 | 71326.632 | 1 | 0.000 |
| Undilate | 0.023 | 0.0028 | 0.017 | 0.028 | 66.245 | 1 | 0.000 |
| Dilate | 0a |  |  |  |  |  |  |
| (Scale) | 0.001 |  |  |  |  |  |  |
| 191 | Pupil | 0.777 | 0.0031 | 0.771 | 0.783 | 61242.188 | 1 | 0.000 |
| Undilate | 0.027 | 0.0030 | 0.022 | 0.033 | 84.326 | 1 | 0.000 |
| Dilate | 0a |  |  |  |  |  |  |
| (Scale) | 0.001 |  |  |  |  |  |  |
| 203 | Pupil | 0.777 | 0.0030 | 0.771 | 0.783 | 67823.261 | 1 | 0.000 |
| Undilate | 0.030 | 0.0030 | 0.024 | 0.035 | 99.589 | 1 | 0.000 |
| Dilate | 0a |  |  |  |  |  |  |
| (Scale) | 0.001 |  |  |  |  |  |  |
| 214 | Pupil | 0.783 | 0.0029 | 0.777 | 0.788 | 73890.394 | 1 | 0.000 |
| Undilate | 0.026 | 0.0027 | 0.021 | 0.032 | 98.303 | 1 | 0.000 |
| Dilate | 0a |  |  |  |  |  |  |
| (Scale) | 0.001 |  |  |  |  |  |  |
| 225 | Pupil | 0.786 | 0.0030 | 0.780 | 0.792 | 70590.269 | 1 | 0.000 |
| Undilate | 0.026 | 0.0031 | 0.020 | 0.032 | 70.317 | 1 | 0.000 |
| Dilate | 0a |  |  |  |  |  |  |
| (Scale) | 0.001 |  |  |  |  |  |  |
| 236 | Pupil | 0.785 | 0.0032 | 0.779 | 0.792 | 58438.173 | 1 | 0.000 |
| Undilate | 0.027 | 0.0033 | 0.020 | 0.033 | 63.639 | 1 | 0.000 |
| Dilate | 0a |  |  |  |  |  |  |
| (Scale) | 0.001 |  |  |  |  |  |  |
| 248 | Pupil | 0.788 | 0.0037 | 0.781 | 0.795 | 44837.131 | 1 | 0.000 |
| Undilate | 0.026 | 0.0034 | 0.019 | 0.033 | 57.260 | 1 | 0.000 |
| Dilate | 0a |  |  |  |  |  |  |
| (Scale) | 0.001 |  |  |  |  |  |  |
| 259 | Pupil | 0.784 | 0.0035 | 0.778 | 0.791 | 51587.405 | 1 | 0.000 |
| Undilate | 0.029 | 0.0036 | 0.022 | 0.036 | 64.461 | 1 | 0.000 |
| Dilate | 0a |  |  |  |  |  |  |
| (Scale) | 0.002 |  |  |  |  |  |  |
| 270 | Pupil | 0.806 | 0.0035 | 0.799 | 0.813 | 52780.732 | 1 | 0.000 |
| Undilate | 0.025 | 0.0037 | 0.018 | 0.032 | 45.355 | 1 | 0.000 |
| Dilate | 0a |  |  |  |  |  |  |
| (Scale) | 0.001 |  |  |  |  |  |  |
| 281 | Pupil | 0.782 | 0.0030 | 0.776 | 0.788 | 68471.401 | 1 | 0.000 |
| Undilate | 0.022 | 0.0036 | 0.015 | 0.029 | 37.267 | 1 | 0.000 |
| Dilate | 0a |  |  |  |  |  |  |
| (Scale) | 0.001 |  |  |  |  |  |  |
| 293 | Pupil | 0.784 | 0.0033 | 0.777 | 0.791 | 54868.671 | 1 | 0.000 |
| Undilate | 0.022 | 0.0032 | 0.016 | 0.028 | 47.306 | 1 | 0.000 |
| Dilate | 0a |  |  |  |  |  |  |
| (Scale) | 0.001 |  |  |  |  |  |  |
| 304 | Pupil | 0.787 | 0.0028 | 0.781 | 0.792 | 78523.939 | 1 | 0.000 |
| Undilate | 0.021 | 0.0031 | 0.015 | 0.027 | 46.115 | 1 | 0.000 |
| Dilate | 0a |  |  |  |  |  |  |
| (Scale) | 0.001 |  |  |  |  |  |  |
| 315 | Pupil | 0.789 | 0.0031 | 0.783 | 0.795 | 66611.713 | 1 | 0.000 |
| Undilate | 0.024 | 0.0029 | 0.018 | 0.029 | 69.562 | 1 | 0.000 |
| Dilate | 0a |  |  |  |  |  |  |
| (Scale) | 0.001 |  |  |  |  |  |  |
| 326 | Pupil | 0.793 | 0.0028 | 0.787 | 0.798 | 81496.946 | 1 | 0.000 |
| Undilate | 0.019 | 0.0030 | 0.014 | 0.025 | 42.827 | 1 | 0.000 |
| Dilate | 0a |  |  |  |  |  |  |
| (Scale) | 0.001 |  |  |  |  |  |  |
| 338 | Pupil | 0.794 | 0.0027 | 0.789 | 0.799 | 85470.611 | 1 | 0.000 |
| Undilate | 0.018 | 0.0027 | 0.012 | 0.023 | 42.104 | 1 | 0.000 |
| Dilate | 0a |  |  |  |  |  |  |
| (Scale) | 0.001 |  |  |  |  |  |  |
| 349 | Pupil | 0.789 | 0.0027 | 0.784 | 0.794 | 85964.308 | 1 | 0.000 |
| Undilate | 0.022 | 0.0028 | 0.016 | 0.028 | 59.819 | 1 | 0.000 |
| Dilate | 0a |  |  |  |  |  |  |
| (Scale) | 0.001 |  |  |  |  |  |  |

Supplementary Table3- Multivariate GEE analysis of the Average SI in all axes.

| Axis | Parameter | B | Std. Error | 95% Wald Confidence Interval | | Hypothesis Test | | |
| --- | --- | --- | --- | --- | --- | --- | --- | --- |
| Lower | Upper | Wald Chi-Square | df | P value |
| 180 | Pupil | 0.790 | 0.0079 | 0.775 | 0.806 | 9937.757 | 1 | 0.000 |
| Undilate | 0.023 | 0.0028 | 0.017 | 0.028 | 65.729 | 1 | 0.000 |
| Dilate | 0a |  |  |  |  |  |  |
| age | 0.000 | 0.0002 | 0.000 | 0.001 | 5.356 | 1 | 0.021 |
| Female | -0.008 | 0.0054 | -0.019 | 0.003 | 2.239 | 1 | 0.135 |
| Male | 0a |  |  |  |  |  |  |
| (Scale) | 0.001 |  |  |  |  |  |  |
| 191 | Pupil | 0.761 | 0.0084 | 0.744 | 0.777 | 8118.597 | 1 | 0.000 |
| Undilate | 0.027 | 0.0030 | 0.021 | 0.033 | 83.383 | 1 | 0.000 |
| Dilate | 0a |  |  |  |  |  |  |
| age | 0.000 | 0.0002 | 0.000 | 0.001 | 8.655 | 1 | 0.003 |
| Female | -0.013 | 0.0054 | -0.023 | -0.002 | 5.679 | 1 | 0.017 |
| Male | 0a |  |  |  |  |  |  |
| (Scale) | 0.001 |  |  |  |  |  |  |
| 203 | Pupil | 0.761 | 0.0084 | 0.745 | 0.778 | 8123.019 | 1 | 0.000 |
| Undilate | 0.029 | 0.0030 | 0.024 | 0.035 | 99.485 | 1 | 0.000 |
| Dilate | 0a |  |  |  |  |  |  |
| age | 0.000 | 0.0002 | 0.000 | 0.001 | 6.851 | 1 | 0.009 |
| Female | -0.009 | 0.0050 | -0.019 | 0.001 | 3.367 | 1 | 0.067 |
| Male | 0a |  |  |  |  |  |  |
| (Scale) | 0.001 |  |  |  |  |  |  |
| 214 | Pupil | 0.778 | 0.0084 | 0.761 | 0.794 | 8578.861 | 1 | 0.000 |
| Undilate | 0.026 | 0.0027 | 0.021 | 0.032 | 97.756 | 1 | 0.000 |
| Dilate | 0a |  |  |  |  |  |  |
| age | 0.000 | 0.0002 | 0.000 | 0.001 | 1.068 | 1 | 0.301 |
| Female | -0.007 | 0.0051 | -0.018 | 0.003 | 2.096 | 1 | 0.148 |
| Male | 0a |  |  |  |  |  |  |
| (Scale) | 0.001 |  |  |  |  |  |  |
| 225 | Pupil | 0.776 | 0.0101 | 0.756 | 0.796 | 5880.582 | 1 | 0.000 |
| Undilate | 0.026 | 0.0031 | 0.020 | 0.032 | 70.150 | 1 | 0.000 |
| Dilate | 0a |  |  |  |  |  |  |
| age | 0.000 | 0.0002 | 0.000 | 0.001 | 2.309 | 1 | 0.129 |
| Female | -0.007 | 0.0049 | -0.016 | 0.003 | 1.938 | 1 | 0.164 |
| Male | 0a |  |  |  |  |  |  |
| (Scale) | 0.001 |  |  |  |  |  |  |
| 236 | Pupil | 0.787 | 0.0105 | 0.766 | 0.807 | 5667.243 | 1 | 0.000 |
| Undilate | 0.027 | 0.0034 | 0.020 | 0.033 | 63.491 | 1 | 0.000 |
| Dilate | 0a |  |  |  |  |  |  |
| age | 1.683E-05 | 0.0002 | 0.000 | 0.000 | 0.007 | 1 | 0.931 |
| Female | -0.005 | 0.0052 | -0.015 | 0.005 | 0.862 | 1 | 0.353 |
| Male | 0a |  |  |  |  |  |  |
| (Scale) | 0.001 |  |  |  |  |  |  |
| 248 | Pupil | 0.781 | 0.0130 | 0.756 | 0.807 | 3588.350 | 1 | 0.000 |
| Undilate | 0.026 | 0.0034 | 0.019 | 0.033 | 57.927 | 1 | 0.000 |
| Dilate | 0a |  |  |  |  |  |  |
| age | 0.000 | 0.0002 | 0.000 | 0.001 | 0.776 | 1 | 0.379 |
| Female | -0.005 | 0.0057 | -0.016 | 0.006 | 0.694 | 1 | 0.405 |
| Male | 0a |  |  |  |  |  |  |
| (Scale) | 0.001 |  |  |  |  |  |  |
| 259 | Pupil | 0.772 | 0.0112 | 0.750 | 0.794 | 4752.333 | 1 | 0.000 |
| Undilate | 0.029 | 0.0036 | 0.022 | 0.036 | 64.589 | 1 | 0.000 |
| Dilate | 0a |  |  |  |  |  |  |
| age | 0.000 | 0.0002 | 0.000 | 0.001 | 3.044 | 1 | 0.081 |
| Female | -0.010 | 0.0056 | -0.021 | 0.001 | 3.069 | 1 | 0.080 |
| Male | 0a |  |  |  |  |  |  |
| (Scale) | 0.002 |  |  |  |  |  |  |
| 270 | Pupil | 0.799 | 0.0117 | 0.776 | 0.822 | 4642.785 | 1 | 0.000 |
| Undilate | 0.025 | 0.0037 | 0.018 | 0.032 | 45.715 | 1 | 0.000 |
| Dilate | 0a |  |  |  |  |  |  |
| age | 0.000 | 0.0002 | 0.000 | 0.001 | 1.165 | 1 | 0.280 |
| Female | -0.005 | 0.0055 | -0.016 | 0.005 | 0.991 | 1 | 0.319 |
| Male | 0a |  |  |  |  |  |  |
| (Scale) | 0.001 |  |  |  |  |  |  |
| 281 | Pupil | 0.772 | 0.0102 | 0.752 | 0.792 | 5698.808 | 1 | 0.000 |
| Undilate | 0.022 | 0.0036 | 0.015 | 0.029 | 37.249 | 1 | 0.000 |
| Dilate | 0a |  |  |  |  |  |  |
| age | 0.000 | 0.0002 | 0.000 | 0.001 | 1.971 | 1 | 0.160 |
| Female | -0.008 | 0.0055 | -0.018 | 0.003 | 1.896 | 1 | 0.168 |
| Male | 0a |  |  |  |  |  |  |
| (Scale) | 0.001 |  |  |  |  |  |  |
| 293 | Pupil | 0.767 | 0.0123 | 0.743 | 0.792 | 3893.205 | 1 | 0.000 |
| Undilate | 0.022 | 0.0031 | 0.016 | 0.028 | 47.536 | 1 | 0.000 |
| Dilate | 0a |  |  |  |  |  |  |
| age | 0.000 | 0.0002 | 0.000 | 0.001 | 2.685 | 1 | 0.101 |
| Female | 0.000 | 0.0057 | -0.012 | 0.011 | 0.008 | 1 | 0.930 |
| Male | 0a |  |  |  |  |  |  |
| (Scale) | 0.001 |  |  |  |  |  |  |
| 304 | Pupil | 0.772 | 0.0081 | 0.757 | 0.788 | 9202.754 | 1 | 0.000 |
| Undilate | 0.021 | 0.0031 | 0.015 | 0.027 | 45.977 | 1 | 0.000 |
| Dilate | 0a |  |  |  |  |  |  |
| age | 0.000 | 0.0002 | 0.000 | 0.001 | 5.752 | 1 | 0.016 |
| Female | -0.007 | 0.0049 | -0.017 | 0.002 | 2.199 | 1 | 0.138 |
| Male | 0a |  |  |  |  |  |  |
| (Scale) | 0.001 |  |  |  |  |  |  |
| 315 | Pupil | 0.795 | 0.0090 | 0.777 | 0.813 | 7812.603 | 1 | 0.000 |
| Undilate | 0.024 | 0.0029 | 0.018 | 0.030 | 69.376 | 1 | 0.000 |
| Dilate | 0a |  |  |  |  |  |  |
| age | -4.572E-05 | 0.0002 | 0.000 | 0.000 | 0.057 | 1 | 0.811 |
| Female | -0.008 | 0.0054 | -0.019 | 0.003 | 2.147 | 1 | 0.143 |
| Male | 0a |  |  |  |  |  |  |
| (Scale) | 0.001 |  |  |  |  |  |  |
| 326 | Pupil | 0.792 | 0.0084 | 0.776 | 0.809 | 8923.871 | 1 | 0.000 |
| Undilate | 0.019 | 0.0030 | 0.014 | 0.025 | 42.627 | 1 | 0.000 |
| Dilate | 0a |  |  |  |  |  |  |
| age | 9.230E-05 | 0.0002 | 0.000 | 0.000 | 0.266 | 1 | 0.606 |
| Female | -0.008 | 0.0052 | -0.018 | 0.002 | 2.287 | 1 | 0.130 |
| Male | 0a |  |  |  |  |  |  |
| (Scale) | 0.001 |  |  |  |  |  |  |
| 338 | Pupil | 0.793 | 0.0081 | 0.777 | 0.809 | 9590.521 | 1 | 0.000 |
| Undilate | 0.018 | 0.0028 | 0.012 | 0.023 | 41.853 | 1 | 0.000 |
| Dilate | 0a |  |  |  |  |  |  |
| age | 8.262E-05 | 0.0002 | 0.000 | 0.000 | 0.249 | 1 | 0.617 |
| Female | -0.006 | 0.0051 | -0.015 | 0.004 | 1.193 | 1 | 0.275 |
| Male | 0a |  |  |  |  |  |  |
| (Scale) | 0.001 |  |  |  |  |  |  |
| 349 | Pupil | 0.779 | 0.0084 | 0.763 | 0.796 | 8515.690 | 1 | 0.000 |
| Undilate | 0.022 | 0.0028 | 0.016 | 0.028 | 59.781 | 1 | 0.000 |
| Dilate | 0a |  |  |  |  |  |  |
| age | 0.000 | 0.0002 | 0.000 | 0.001 | 2.610 | 1 | 0.106 |
| Female | -0.005 | 0.0047 | -0.015 | 0.004 | 1.359 | 1 | 0.244 |
| Male | 0a |  |  |  |  |  |  |
| (Scale) | 0.001 |  |  |  |  |  |  |

Supplementary Table4- Average SI comparison among male and female population in all axes

| Eye | Pupil status | Axis_2 | Parameter | B | Std. Error | 95% Wald Confidence Interval | | Hypothesis Test | | |
| --- | --- | --- | --- | --- | --- | --- | --- | --- | --- | --- |
| Lower | Upper | Wald Chi-Square | df | P value |
| OD | Undilate | 180 | Sex | 0.826 | 0.0057 | 0.815 | 0.838 | 20881.307 | 1 | 0.000 |
| Female | -0.004 | 0.0071 | -0.018 | 0.010 | 0.339 | 1 | 0.560 |
| Male | 0a |  |  |  |  |  |  |
| (Scale) | 0.001 |  |  |  |  |  |  |
| 191 | Sex | 0.807 | 0.0062 | 0.795 | 0.820 | 16996.522 | 1 | 0.000 |
| Female | -0.010 | 0.0075 | -0.025 | 0.005 | 1.831 | 1 | 0.176 |
| Male | 0a |  |  |  |  |  |  |
| (Scale) | 0.001 |  |  |  |  |  |  |
| 203 | Sex | 0.809 | 0.0055 | 0.798 | 0.820 | 21740.636 | 1 | 0.000 |
| Female | -0.006 | 0.0073 | -0.021 | 0.008 | 0.786 | 1 | 0.375 |
| Male | 0a |  |  |  |  |  |  |
| (Scale) | 0.001 |  |  |  |  |  |  |
| 214 | Sex | 0.816 | 0.0049 | 0.807 | 0.826 | 27609.173 | 1 | 0.000 |
| Female | -0.011 | 0.0064 | -0.024 | 0.001 | 3.064 | 1 | 0.080 |
| Male | 0a |  |  |  |  |  |  |
| (Scale) | 0.001 |  |  |  |  |  |  |
| 225 | Sex | 0.814 | 0.0054 | 0.803 | 0.824 | 22976.581 | 1 | 0.000 |
| Female | -0.006 | 0.0068 | -0.019 | 0.008 | 0.673 | 1 | 0.412 |
| Male | 0a |  |  |  |  |  |  |
| (Scale) | 0.001 |  |  |  |  |  |  |
| 236 | Sex | 0.817 | 0.0053 | 0.806 | 0.827 | 23465.147 | 1 | 0.000 |
| Female | -0.008 | 0.0068 | -0.022 | 0.005 | 1.544 | 1 | 0.214 |
| Male | 0a |  |  |  |  |  |  |
| (Scale) | 0.001 |  |  |  |  |  |  |
| 248 | Sex | 0.819 | 0.0055 | 0.808 | 0.830 | 22438.541 | 1 | 0.000 |
| Female | -0.007 | 0.0071 | -0.021 | 0.007 | 1.039 | 1 | 0.308 |
| Male | 0a |  |  |  |  |  |  |
| (Scale) | 0.001 |  |  |  |  |  |  |
| 259 | Sex | 0.825 | 0.0052 | 0.814 | 0.835 | 25380.404 | 1 | 0.000 |
| Female | -0.015 | 0.0072 | -0.029 | -0.001 | 4.337 | 1 | 0.037 |
| Male | 0a |  |  |  |  |  |  |
| (Scale) | 0.001 |  |  |  |  |  |  |
| 270 | Sex | 0.839 | 0.0053 | 0.828 | 0.849 | 25269.783 | 1 | 0.000 |
| Female | -0.011 | 0.0072 | -0.025 | 0.003 | 2.252 | 1 | 0.133 |
| Male | 0a |  |  |  |  |  |  |
| (Scale) | 0.001 |  |  |  |  |  |  |
| 281 | Sex | 0.806 | 0.0062 | 0.794 | 0.818 | 16805.948 | 1 | 0.000 |
| Female | -0.004 | 0.0087 | -0.021 | 0.013 | 0.261 | 1 | 0.609 |
| Male | 0a |  |  |  |  |  |  |
| (Scale) | 0.002 |  |  |  |  |  |  |
| 293 | Sex | 0.804 | 0.0066 | 0.791 | 0.817 | 14780.386 | 1 | 0.000 |
| Female | 0.000 | 0.0077 | -0.015 | 0.015 | 0.001 | 1 | 0.979 |
| Male | 0a |  |  |  |  |  |  |
| (Scale) | 0.001 |  |  |  |  |  |  |
| 304 | Sex | 0.814 | 0.0054 | 0.803 | 0.825 | 22720.216 | 1 | 0.000 |
| Female | -0.012 | 0.0066 | -0.025 | 0.001 | 3.199 | 1 | 0.074 |
| Male | 0a |  |  |  |  |  |  |
| (Scale) | 0.001 |  |  |  |  |  |  |
| 315 | Sex | 0.818 | 0.0052 | 0.808 | 0.828 | 24634.405 | 1 | 0.000 |
| Female | -0.010 | 0.0067 | -0.023 | 0.003 | 2.107 | 1 | 0.147 |
| Male | 0a |  |  |  |  |  |  |
| (Scale) | 0.001 |  |  |  |  |  |  |
| 326 | Sex | 0.815 | 0.0055 | 0.805 | 0.826 | 21784.394 | 1 | 0.000 |
| Female | -0.008 | 0.0067 | -0.021 | 0.005 | 1.359 | 1 | 0.244 |
| Male | 0a |  |  |  |  |  |  |
| (Scale) | 0.001 |  |  |  |  |  |  |
| 338 | Sex | 0.813 | 0.0058 | 0.802 | 0.825 | 19839.139 | 1 | 0.000 |
| Female | -0.003 | 0.0067 | -0.016 | 0.010 | 0.202 | 1 | 0.653 |
| Male | 0a |  |  |  |  |  |  |
| (Scale) | 0.001 |  |  |  |  |  |  |
| 349 | Sex | 0.810 | 0.0051 | 0.801 | 0.820 | 25532.290 | 1 | 0.000 |
| Female | -0.003 | 0.0062 | -0.015 | 0.009 | 0.250 | 1 | 0.617 |
| Male | 0a |  |  |  |  |  |  |
| (Scale) | 0.001 |  |  |  |  |  |  |
| Undilate | 180 | Sex | 0.806 | 0.0043 | 0.797 | 0.814 | 35083.575 | 1 | 0.000 |
| Female | -0.009 | 0.0062 | -0.021 | 0.003 | 2.110 | 1 | 0.146 |
| Male | 0a |  |  |  |  |  |  |
| (Scale) | 0.001 |  |  |  |  |  |  |
| 191 | Sex | 0.784 | 0.0040 | 0.776 | 0.792 | 38360.535 | 1 | 0.000 |
| Female | -0.016 | 0.0061 | -0.028 | -0.004 | 6.803 | 1 | 0.009 |
| Male | 0a |  |  |  |  |  |  |
| (Scale) | 0.001 |  |  |  |  |  |  |
| 203 | Sex | 0.778 | 0.0051 | 0.768 | 0.788 | 23544.938 | 1 | 0.000 |
| Female | -0.011 | 0.0069 | -0.024 | 0.002 | 2.551 | 1 | 0.110 |
| Male | 0a |  |  |  |  |  |  |
| (Scale) | 0.001 |  |  |  |  |  |  |
| 214 | Sex | 0.783 | 0.0042 | 0.775 | 0.791 | 34786.268 | 1 | 0.000 |
| Female | -0.009 | 0.0065 | -0.022 | 0.004 | 1.888 | 1 | 0.169 |
| Male | 0a |  |  |  |  |  |  |
| (Scale) | 0.001 |  |  |  |  |  |  |
| 225 | Sex | 0.793 | 0.0043 | 0.784 | 0.801 | 33835.351 | 1 | 0.000 |
| Female | -0.013 | 0.0063 | -0.025 | 0.000 | 4.055 | 1 | 0.044 |
| Male | 0a |  |  |  |  |  |  |
| (Scale) | 0.001 |  |  |  |  |  |  |
| 236 | Sex | 0.781 | 0.0054 | 0.770 | 0.792 | 20783.211 | 1 | 0.000 |
| Female | 0.001 | 0.0069 | -0.013 | 0.014 | 0.006 | 1 | 0.937 |
| Male | 0a |  |  |  |  |  |  |
| (Scale) | 0.001 |  |  |  |  |  |  |
| 248 | Sex | 0.786 | 0.0071 | 0.772 | 0.800 | 12241.551 | 1 | 0.000 |
| Female | 0.004 | 0.0086 | -0.013 | 0.020 | 0.176 | 1 | 0.675 |
| Male | 0a |  |  |  |  |  |  |
| (Scale) | 0.002 |  |  |  |  |  |  |
| 259 | Sex | 0.790 | 0.0050 | 0.780 | 0.799 | 25396.818 | 1 | 0.000 |
| Female | -0.011 | 0.0075 | -0.026 | 0.003 | 2.256 | 1 | 0.133 |
| Male | 0a |  |  |  |  |  |  |
| (Scale) | 0.001 |  |  |  |  |  |  |
| 270 | Sex | 0.809 | 0.0046 | 0.800 | 0.818 | 30392.132 | 1 | 0.000 |
| Female | -0.010 | 0.0068 | -0.023 | 0.004 | 2.015 | 1 | 0.156 |
| Male | 0a |  |  |  |  |  |  |
| (Scale) | 0.001 |  |  |  |  |  |  |
| 281 | Sex | 0.782 | 0.0048 | 0.773 | 0.791 | 26305.135 | 1 | 0.000 |
| Female | -0.006 | 0.0069 | -0.020 | 0.007 | 0.851 | 1 | 0.356 |
| Male | 0a |  |  |  |  |  |  |
| (Scale) | 0.001 |  |  |  |  |  |  |
| 293 | Sex | 0.782 | 0.0044 | 0.773 | 0.791 | 31281.465 | 1 | 0.000 |
| Female | -0.001 | 0.0064 | -0.013 | 0.012 | 0.019 | 1 | 0.890 |
| Male | 0a |  |  |  |  |  |  |
| (Scale) | 0.001 |  |  |  |  |  |  |
| 304 | Sex | 0.786 | 0.0047 | 0.776 | 0.795 | 28506.151 | 1 | 0.000 |
| Female | -0.009 | 0.0071 | -0.023 | 0.004 | 1.788 | 1 | 0.181 |
| Male | 0a |  |  |  |  |  |  |
| (Scale) | 0.001 |  |  |  |  |  |  |
| 315 | Sex | 0.793 | 0.0048 | 0.783 | 0.802 | 27635.797 | 1 | 0.000 |
| Female | -0.010 | 0.0074 | -0.025 | 0.005 | 1.814 | 1 | 0.178 |
| Male | 0a |  |  |  |  |  |  |
| (Scale) | 0.001 |  |  |  |  |  |  |
| 326 | Sex | 0.796 | 0.0045 | 0.787 | 0.805 | 31017.240 | 1 | 0.000 |
| Female | -0.005 | 0.0058 | -0.016 | 0.007 | 0.672 | 1 | 0.412 |
| Male | 0a |  |  |  |  |  |  |
| (Scale) | 0.001 |  |  |  |  |  |  |
| 338 | Sex | 0.800 | 0.0044 | 0.791 | 0.808 | 32759.111 | 1 | 0.000 |
| Female | -0.010 | 0.0063 | -0.022 | 0.002 | 2.530 | 1 | 0.112 |
| Male | 0a |  |  |  |  |  |  |
| (Scale) | 0.001 |  |  |  |  |  |  |
| 349 | Sex | 0.788 | 0.0046 | 0.779 | 0.797 | 29696.204 | 1 | 0.000 |
| Female | -0.003 | 0.0059 | -0.015 | 0.008 | 0.347 | 1 | 0.556 |
| Male | 0a |  |  |  |  |  |  |
| (Scale) | 0.001 |  |  |  |  |  |  |
| OS | Undilate | 180 | Sex | 0.833 | 0.0052 | 0.823 | 0.843 | 25787.616 | 1 | 0.000 |
| Female | -0.008 | 0.0069 | -0.022 | 0.005 | 1.461 | 1 | 0.227 |
| Male | 0a |  |  |  |  |  |  |
| (Scale) | 0.001 |  |  |  |  |  |  |
| 191 | Sex | 0.809 | 0.0055 | 0.798 | 0.820 | 21589.544 | 1 | 0.000 |
| Female | -0.006 | 0.0070 | -0.020 | 0.008 | 0.728 | 1 | 0.393 |
| Male | 0a |  |  |  |  |  |  |
| (Scale) | 0.001 |  |  |  |  |  |  |
| 203 | Sex | 0.812 | 0.0047 | 0.803 | 0.821 | 30010.750 | 1 | 0.000 |
| Female | -0.009 | 0.0063 | -0.021 | 0.003 | 2.088 | 1 | 0.148 |
| Male | 0a |  |  |  |  |  |  |
| (Scale) | 0.001 |  |  |  |  |  |  |
| 214 | Sex | 0.810 | 0.0047 | 0.801 | 0.819 | 29798.442 | 1 | 0.000 |
| Female | -0.005 | 0.0065 | -0.017 | 0.008 | 0.518 | 1 | 0.472 |
| Male | 0a |  |  |  |  |  |  |
| (Scale) | 0.001 |  |  |  |  |  |  |
| 225 | Sex | 0.816 | 0.0048 | 0.806 | 0.825 | 28549.061 | 1 | 0.000 |
| Female | -0.007 | 0.0067 | -0.020 | 0.006 | 0.992 | 1 | 0.319 |
| Male | 0a |  |  |  |  |  |  |
| (Scale) | 0.001 |  |  |  |  |  |  |
| 236 | Sex | 0.815 | 0.0057 | 0.804 | 0.826 | 20311.402 | 1 | 0.000 |
| Female | -0.007 | 0.0074 | -0.021 | 0.008 | 0.803 | 1 | 0.370 |
| Male | 0a |  |  |  |  |  |  |
| (Scale) | 0.001 |  |  |  |  |  |  |
| 248 | Sex | 0.819 | 0.0043 | 0.811 | 0.828 | 36976.091 | 1 | 0.000 |
| Female | -0.012 | 0.0071 | -0.026 | 0.002 | 2.884 | 1 | 0.089 |
| Male | 0a |  |  |  |  |  |  |
| (Scale) | 0.001 |  |  |  |  |  |  |
| 259 | Sex | 0.817 | 0.0042 | 0.809 | 0.825 | 37337.229 | 1 | 0.000 |
| Female | -0.014 | 0.0082 | -0.030 | 0.002 | 2.766 | 1 | 0.096 |
| Male | 0a |  |  |  |  |  |  |
| (Scale) | 0.002 |  |  |  |  |  |  |
| 270 | Sex | 0.827 | 0.0057 | 0.816 | 0.838 | 20753.068 | 1 | 0.000 |
| Female | 0.004 | 0.0074 | -0.010 | 0.019 | 0.330 | 1 | 0.565 |
| Male | 0a |  |  |  |  |  |  |
| (Scale) | 0.001 |  |  |  |  |  |  |
| 281 | Sex | 0.808 | 0.0049 | 0.798 | 0.818 | 27192.399 | 1 | 0.000 |
| Female | -0.009 | 0.0076 | -0.024 | 0.006 | 1.318 | 1 | 0.251 |
| Male | 0a |  |  |  |  |  |  |
| (Scale) | 0.001 |  |  |  |  |  |  |
| 293 | Sex | 0.808 | 0.0053 | 0.797 | 0.818 | 23593.957 | 1 | 0.000 |
| Female | -0.001 | 0.0074 | -0.016 | 0.013 | 0.025 | 1 | 0.875 |
| Male | 0a |  |  |  |  |  |  |
| (Scale) | 0.001 |  |  |  |  |  |  |
| 304 | Sex | 0.806 | 0.0059 | 0.794 | 0.817 | 18863.249 | 1 | 0.000 |
| Female | 0.003 | 0.0078 | -0.012 | 0.019 | 0.170 | 1 | 0.680 |
| Male | 0a |  |  |  |  |  |  |
| (Scale) | 0.002 |  |  |  |  |  |  |
| 315 | Sex | 0.815 | 0.0052 | 0.805 | 0.826 | 24247.405 | 1 | 0.000 |
| Female | -0.006 | 0.0067 | -0.019 | 0.007 | 0.803 | 1 | 0.370 |
| Male | 0a |  |  |  |  |  |  |
| (Scale) | 0.001 |  |  |  |  |  |  |
| 326 | Sex | 0.818 | 0.0055 | 0.808 | 0.829 | 22289.521 | 1 | 0.000 |
| Female | -0.011 | 0.0073 | -0.025 | 0.003 | 2.299 | 1 | 0.129 |
| Male | 0a |  |  |  |  |  |  |
| (Scale) | 0.001 |  |  |  |  |  |  |
| 338 | Sex | 0.813 | 0.0057 | 0.802 | 0.824 | 20419.097 | 1 | 0.000 |
| Female | -0.003 | 0.0069 | -0.017 | 0.010 | 0.231 | 1 | 0.631 |
| Male | 0a |  |  |  |  |  |  |
| (Scale) | 0.001 |  |  |  |  |  |  |
| 349 | Sex | 0.814 | 0.0056 | 0.803 | 0.825 | 21391.419 | 1 | 0.000 |
| Female | -0.003 | 0.0072 | -0.017 | 0.011 | 0.159 | 1 | 0.690 |
| Male | 0a |  |  |  |  |  |  |
| (Scale) | 0.001 |  |  |  |  |  |  |
| Undilate | 180 | Sex | 0.809 | 0.0042 | 0.801 | 0.817 | 37387.349 | 1 | 0.000 |
| Female | -0.005 | 0.0068 | -0.018 | 0.008 | 0.554 | 1 | 0.457 |
| Male | 0a |  |  |  |  |  |  |
| (Scale) | 0.001 |  |  |  |  |  |  |
| 191 | Sex | 0.784 | 0.0044 | 0.775 | 0.792 | 31962.182 | 1 | 0.000 |
| Female | -0.012 | 0.0072 | -0.026 | 0.002 | 2.633 | 1 | 0.105 |
| Male | 0a |  |  |  |  |  |  |
| (Scale) | 0.001 |  |  |  |  |  |  |
| 203 | Sex | 0.783 | 0.0046 | 0.775 | 0.792 | 29529.334 | 1 | 0.000 |
| Female | -0.003 | 0.0066 | -0.016 | 0.009 | 0.270 | 1 | 0.603 |
| Male | 0a |  |  |  |  |  |  |
| (Scale) | 0.001 |  |  |  |  |  |  |
| 214 | Sex | 0.787 | 0.0041 | 0.779 | 0.796 | 36500.850 | 1 | 0.000 |
| Female | -0.002 | 0.0063 | -0.014 | 0.010 | 0.103 | 1 | 0.748 |
| Male | 0a |  |  |  |  |  |  |
| (Scale) | 0.001 |  |  |  |  |  |  |
| 225 | Sex | 0.785 | 0.0055 | 0.774 | 0.795 | 20196.136 | 1 | 0.000 |
| Female | 0.002 | 0.0072 | -0.012 | 0.016 | 0.088 | 1 | 0.767 |
| Male | 0a |  |  |  |  |  |  |
| (Scale) | 0.001 |  |  |  |  |  |  |
| 236 | Sex | 0.791 | 0.0050 | 0.781 | 0.801 | 25189.095 | 1 | 0.000 |
| Female | -0.004 | 0.0079 | -0.020 | 0.011 | 0.303 | 1 | 0.582 |
| Male | 0a |  |  |  |  |  |  |
| (Scale) | 0.001 |  |  |  |  |  |  |
| 248 | Sex | 0.789 | 0.0058 | 0.777 | 0.800 | 18556.741 | 1 | 0.000 |
| Female | 0.000 | 0.0080 | -0.015 | 0.016 | 0.001 | 1 | 0.972 |
| Male | 0a |  |  |  |  |  |  |
| (Scale) | 0.002 |  |  |  |  |  |  |
| 259 | Sex | 0.782 | 0.0068 | 0.768 | 0.795 | 13399.645 | 1 | 0.000 |
| Female | 0.006 | 0.0089 | -0.011 | 0.024 | 0.465 | 1 | 0.495 |
| Male | 0a |  |  |  |  |  |  |
| (Scale) | 0.002 |  |  |  |  |  |  |
| 270 | Sex | 0.809 | 0.0068 | 0.796 | 0.823 | 13962.124 | 1 | 0.000 |
| Female | -0.002 | 0.0093 | -0.020 | 0.016 | 0.056 | 1 | 0.812 |
| Male | 0a |  |  |  |  |  |  |
| (Scale) | 0.002 |  |  |  |  |  |  |
| 281 | Sex | 0.788 | 0.0047 | 0.778 | 0.797 | 28403.819 | 1 | 0.000 |
| Female | -0.006 | 0.0069 | -0.020 | 0.007 | 0.788 | 1 | 0.375 |
| Male | 0a |  |  |  |  |  |  |
| (Scale) | 0.001 |  |  |  |  |  |  |
| 293 | Sex | 0.784 | 0.0074 | 0.769 | 0.798 | 11328.976 | 1 | 0.000 |
| Female | 0.006 | 0.0087 | -0.012 | 0.023 | 0.406 | 1 | 0.524 |
| Male | 0a |  |  |  |  |  |  |
| (Scale) | 0.002 |  |  |  |  |  |  |
| 304 | Sex | 0.795 | 0.0043 | 0.786 | 0.803 | 34477.015 | 1 | 0.000 |
| Female | -0.005 | 0.0062 | -0.017 | 0.007 | 0.691 | 1 | 0.406 |
| Male | 0a |  |  |  |  |  |  |
| (Scale) | 0.001 |  |  |  |  |  |  |
| 315 | Sex | 0.794 | 0.0049 | 0.784 | 0.803 | 26456.061 | 1 | 0.000 |
| Female | -0.007 | 0.0069 | -0.020 | 0.007 | 1.013 | 1 | 0.314 |
| Male | 0a |  |  |  |  |  |  |
| (Scale) | 0.001 |  |  |  |  |  |  |
| 326 | Sex | 0.795 | 0.0048 | 0.785 | 0.804 | 27083.808 | 1 | 0.000 |
| Female | -0.006 | 0.0068 | -0.020 | 0.007 | 0.862 | 1 | 0.353 |
| Male | 0a |  |  |  |  |  |  |
| (Scale) | 0.001 |  |  |  |  |  |  |
| 338 | Sex | 0.795 | 0.0042 | 0.787 | 0.804 | 35635.131 | 1 | 0.000 |
| Female | -0.004 | 0.0062 | -0.017 | 0.008 | 0.529 | 1 | 0.467 |
| Male | 0a |  |  |  |  |  |  |
| (Scale) | 0.001 |  |  |  |  |  |  |
| 349 | Sex | 0.796 | 0.0040 | 0.788 | 0.804 | 38815.462 | 1 | 0.000 |
| Female | -0.008 | 0.0062 | -0.020 | 0.004 | 1.766 | 1 | 0.184 |
| Male | 0a |  |  |  |  |  |  |
| (Scale) | 0.001 |  |  |  |  |  |  |
